# Supplementary material
Source: publisher site journal article supplement (https://www.spandidos-publications.com/3050/downloadSupplementary)

Figure S1. Transfection efficiency measurement of miR-195-5p and pcDNA-NUAK2. (A) Following transfection of miR-195-5p mimic, mimic-NC, has-miR-195-5p inhibitor and inhibitor-NC, the transfection efficiency measurement of miR-195-5p in the MDA-MB-231 cells by RT-qPCR. (B) Transfection efficiency measurement of NUAK2 in the MDA-MB-231 cells by RT-qPCR. (C) The protein expression of NUAK2 in the MDA-MB-231 cells by western blotting. \*\* $P < 0.01$  and \*\*\* $P < 0.001$ . miR, microRNA; NUAK2, SNF1-like kinase 2; NC, negative control; RT-qPCR, reverse transcription-quantitative PCR..

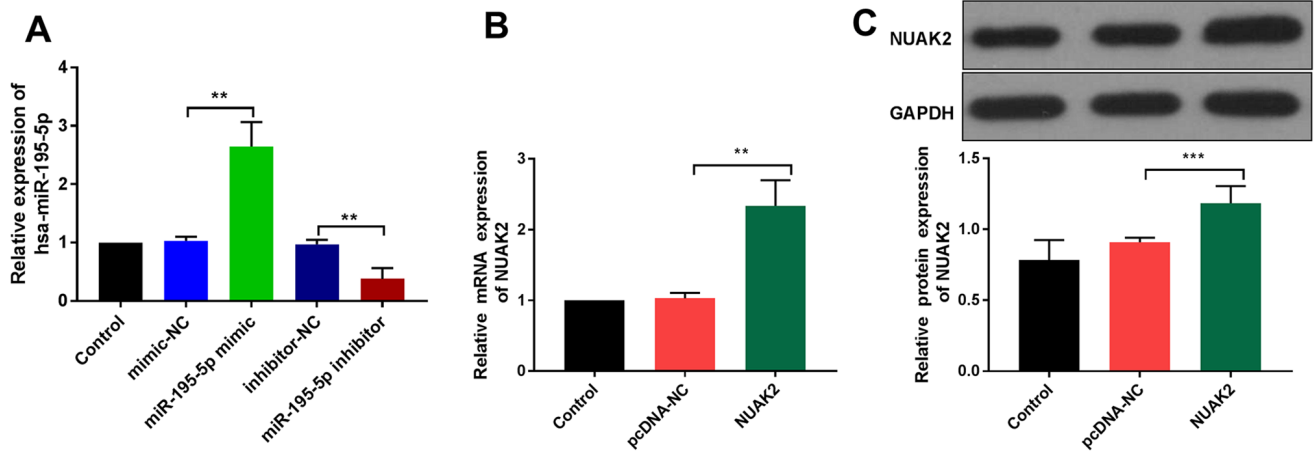

Supplement: Supplementary file 1 [file downloadSupplementary]
